# Supplementary material for: Efficient hydrogen production from formic acid using TiO2-supported AgPd@Pd nanocatalysts
Source: Royal Society of Chemistry journal article supplement (doi:10.1039/c4ta06988a), 2015-01-01
Supplement: c4ta06988a1.pdf [file c4ta06988a1.pdf]

## Supplementary Information

### Efficient hydrogen production from formic acid using TiO<sub>2</sub>-supported AgPd@Pd nanocatalysts

Masashi Hattori,<sup>a</sup> Hisahiro Einaga,<sup>b</sup> Takeshi Diao<sup>c</sup> and Masaharu Tsuji<sup>\*a</sup>

<sup>a</sup> *Institute for Materials Chemistry and Engineering, Kyushu University, Kasuga 816-8580, Japan. E-mail tsuji@cm.kyushu-u.ac.jp*

<sup>b</sup> *Department of Energy and Material Sciences, Faculty of Engineering Sciences, Kyushu University, Kasuga 816-8580, Japan*

<sup>c</sup> *International Research Center for Hydrogen Energy, Kyushu University, Motoooka, Fukuoka, 819-0395, Japan*

\*Corresponding author: e-mail tsuji@cm.kyushu-u.ac.jp

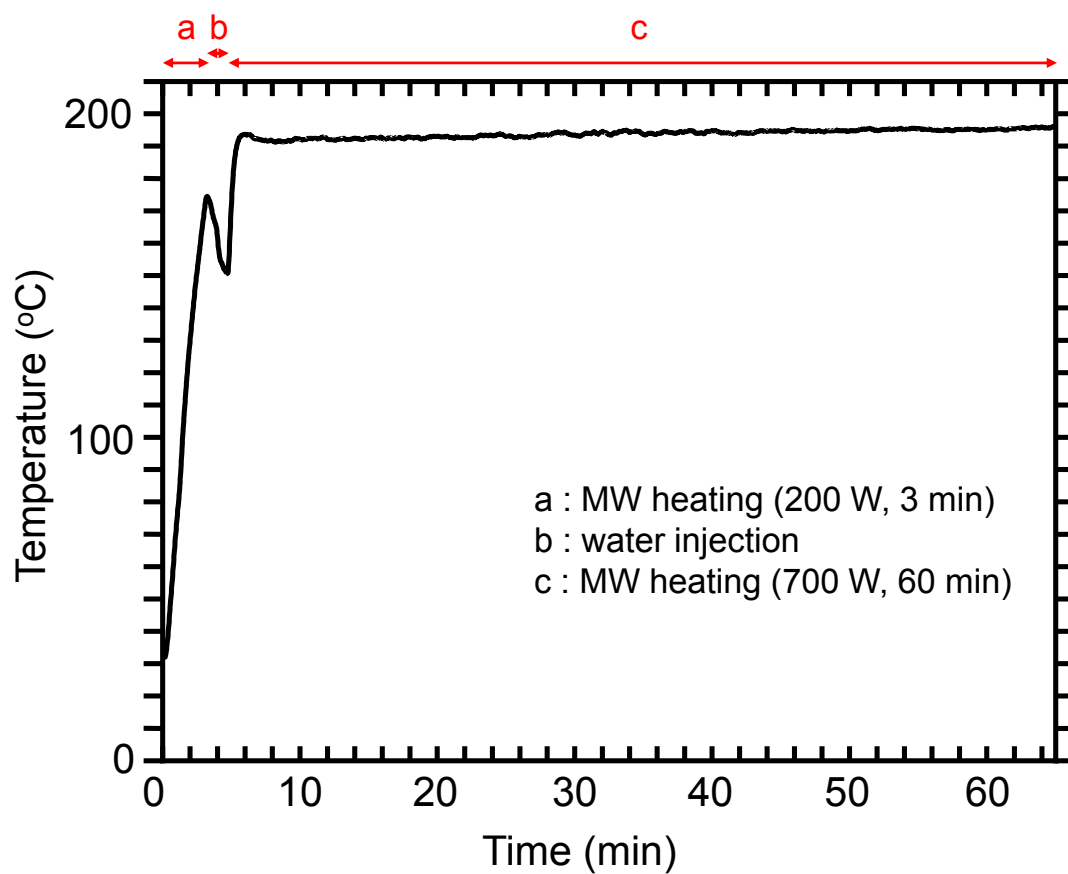

**Fig. S1** Temperature profile of microwave heating process when TiO<sub>2</sub> nanoparticles were formed.

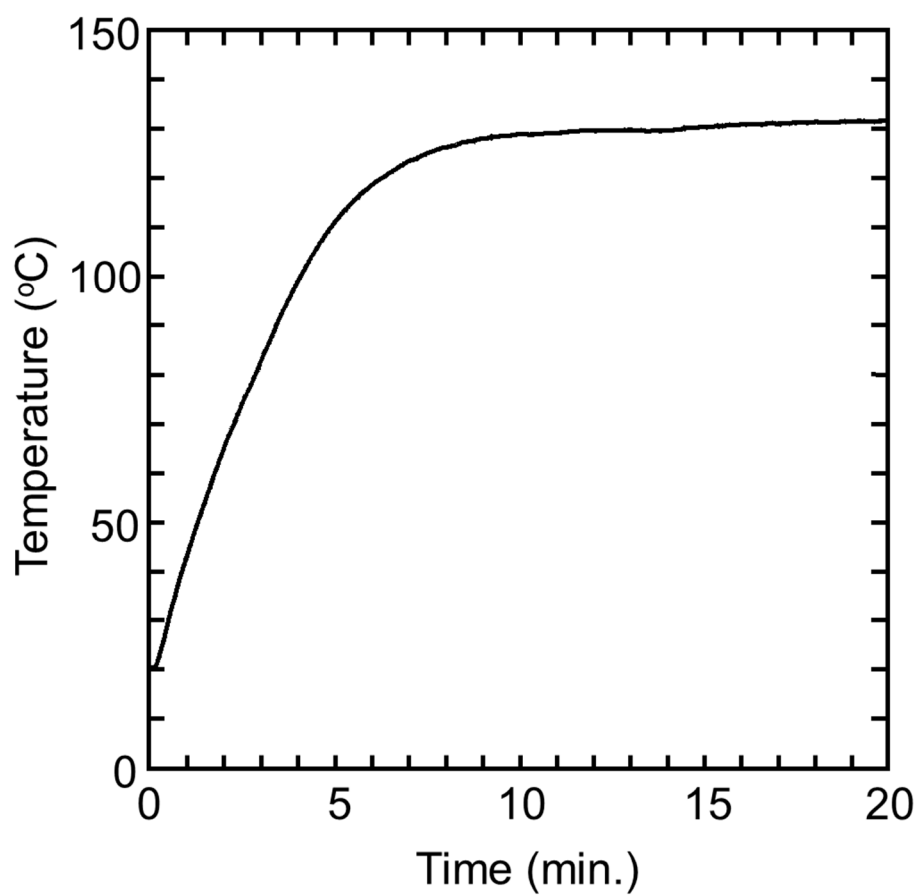

**Fig. S2** Temperature profile of microwave heating process when Ag nanoparticles were formed.

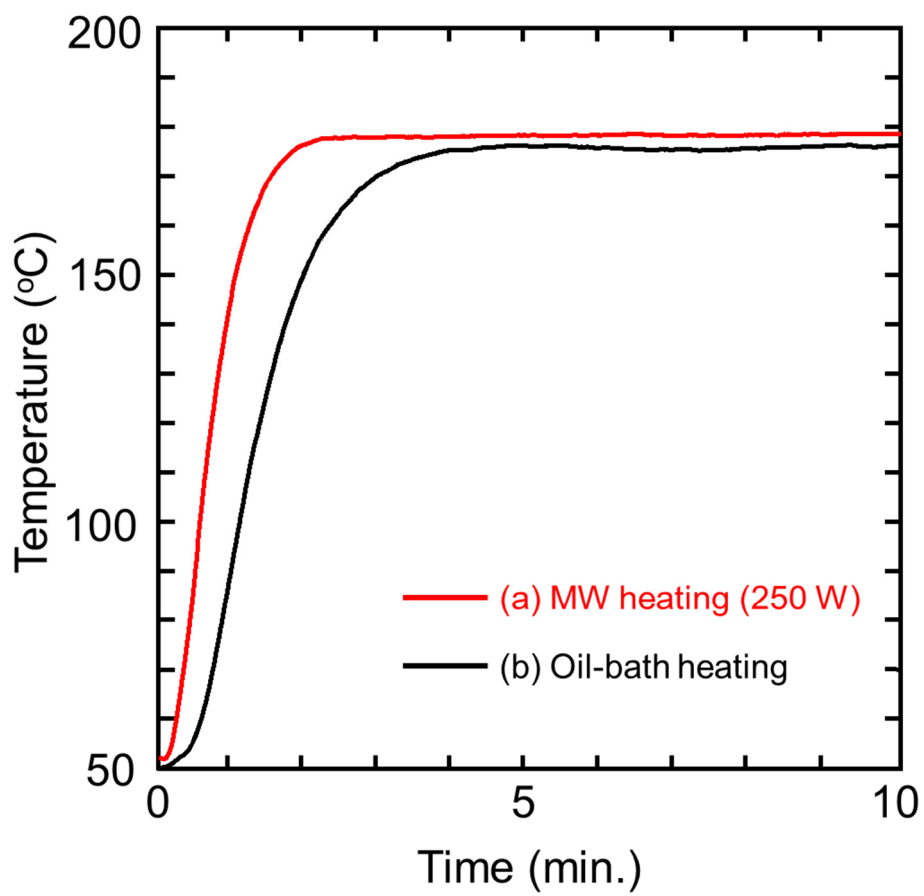

**Fig. S3** Temperature profile of Pd shell reduction process using (a) MW heating (250 W) at 178 °C and (b) oil-bath heating at 176 °C.

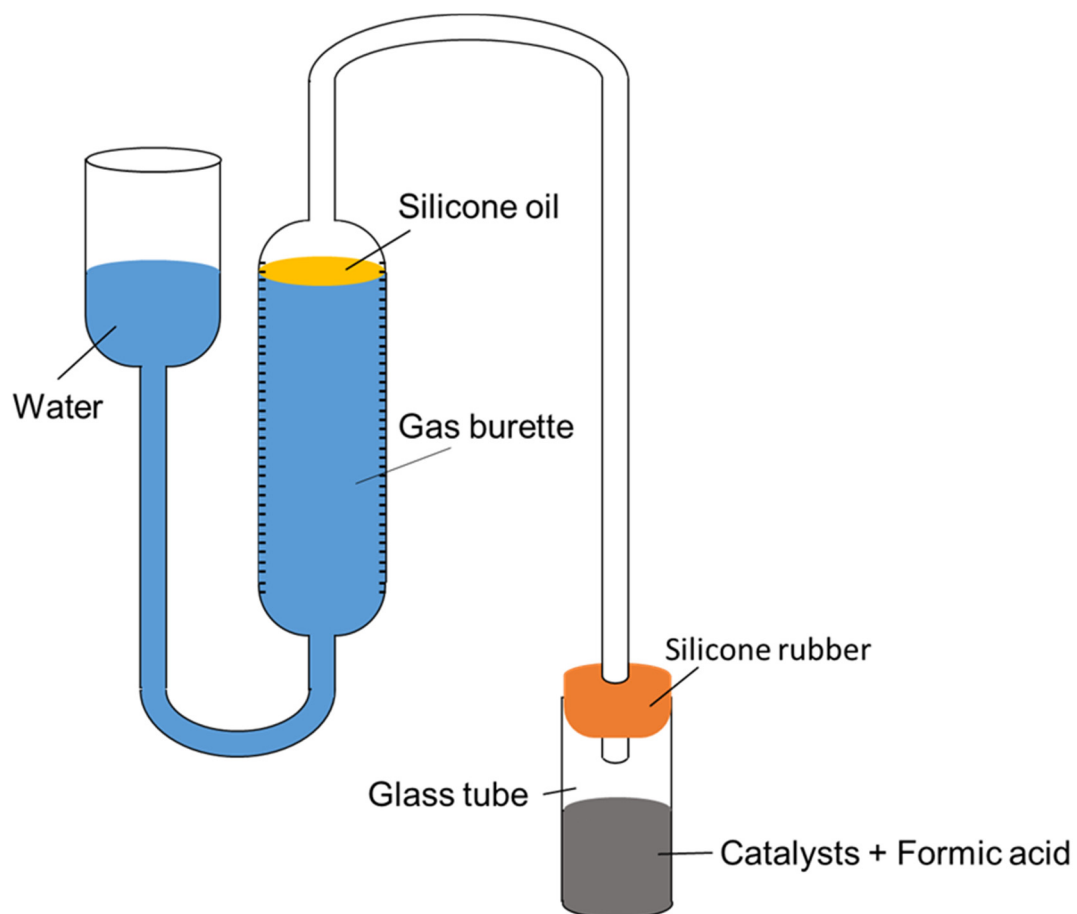

**Fig. S4** The schematic view of hydrogen production activity measurement system. 1ml silicon oil was added on surface of water in the gas burette to keep out dissolution of  $H_2$  to water. Before measurement, the glass tube was filled with Ar gas. All measurement had be carried out at normal pressure.

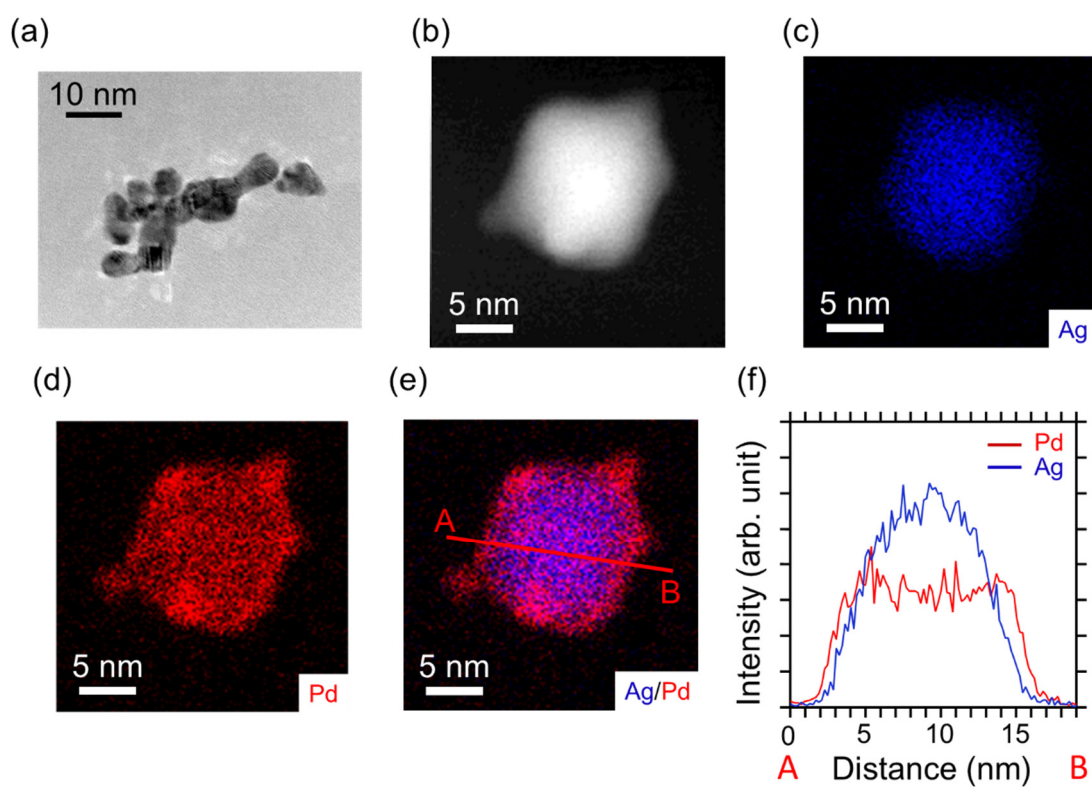

**Fig. S5** TEM, STEM, and STEM-EDS images of the bare AgPd@Pd nanocatalysts reduced by MW (250 W) (a) TEM image, (b) STEM image, (c) Ag component, (d) Pd component, (e) Ag and Pd components, and (f) line analysis data along the red line shown in Fig. S4(e).
